# Supplementary material for: Resolving the relationships of Paleocene placental mammals
Source: PubMed Central journal article supplement (PMC6849585; doi:10.1111/brv.12242), 2015-12-21

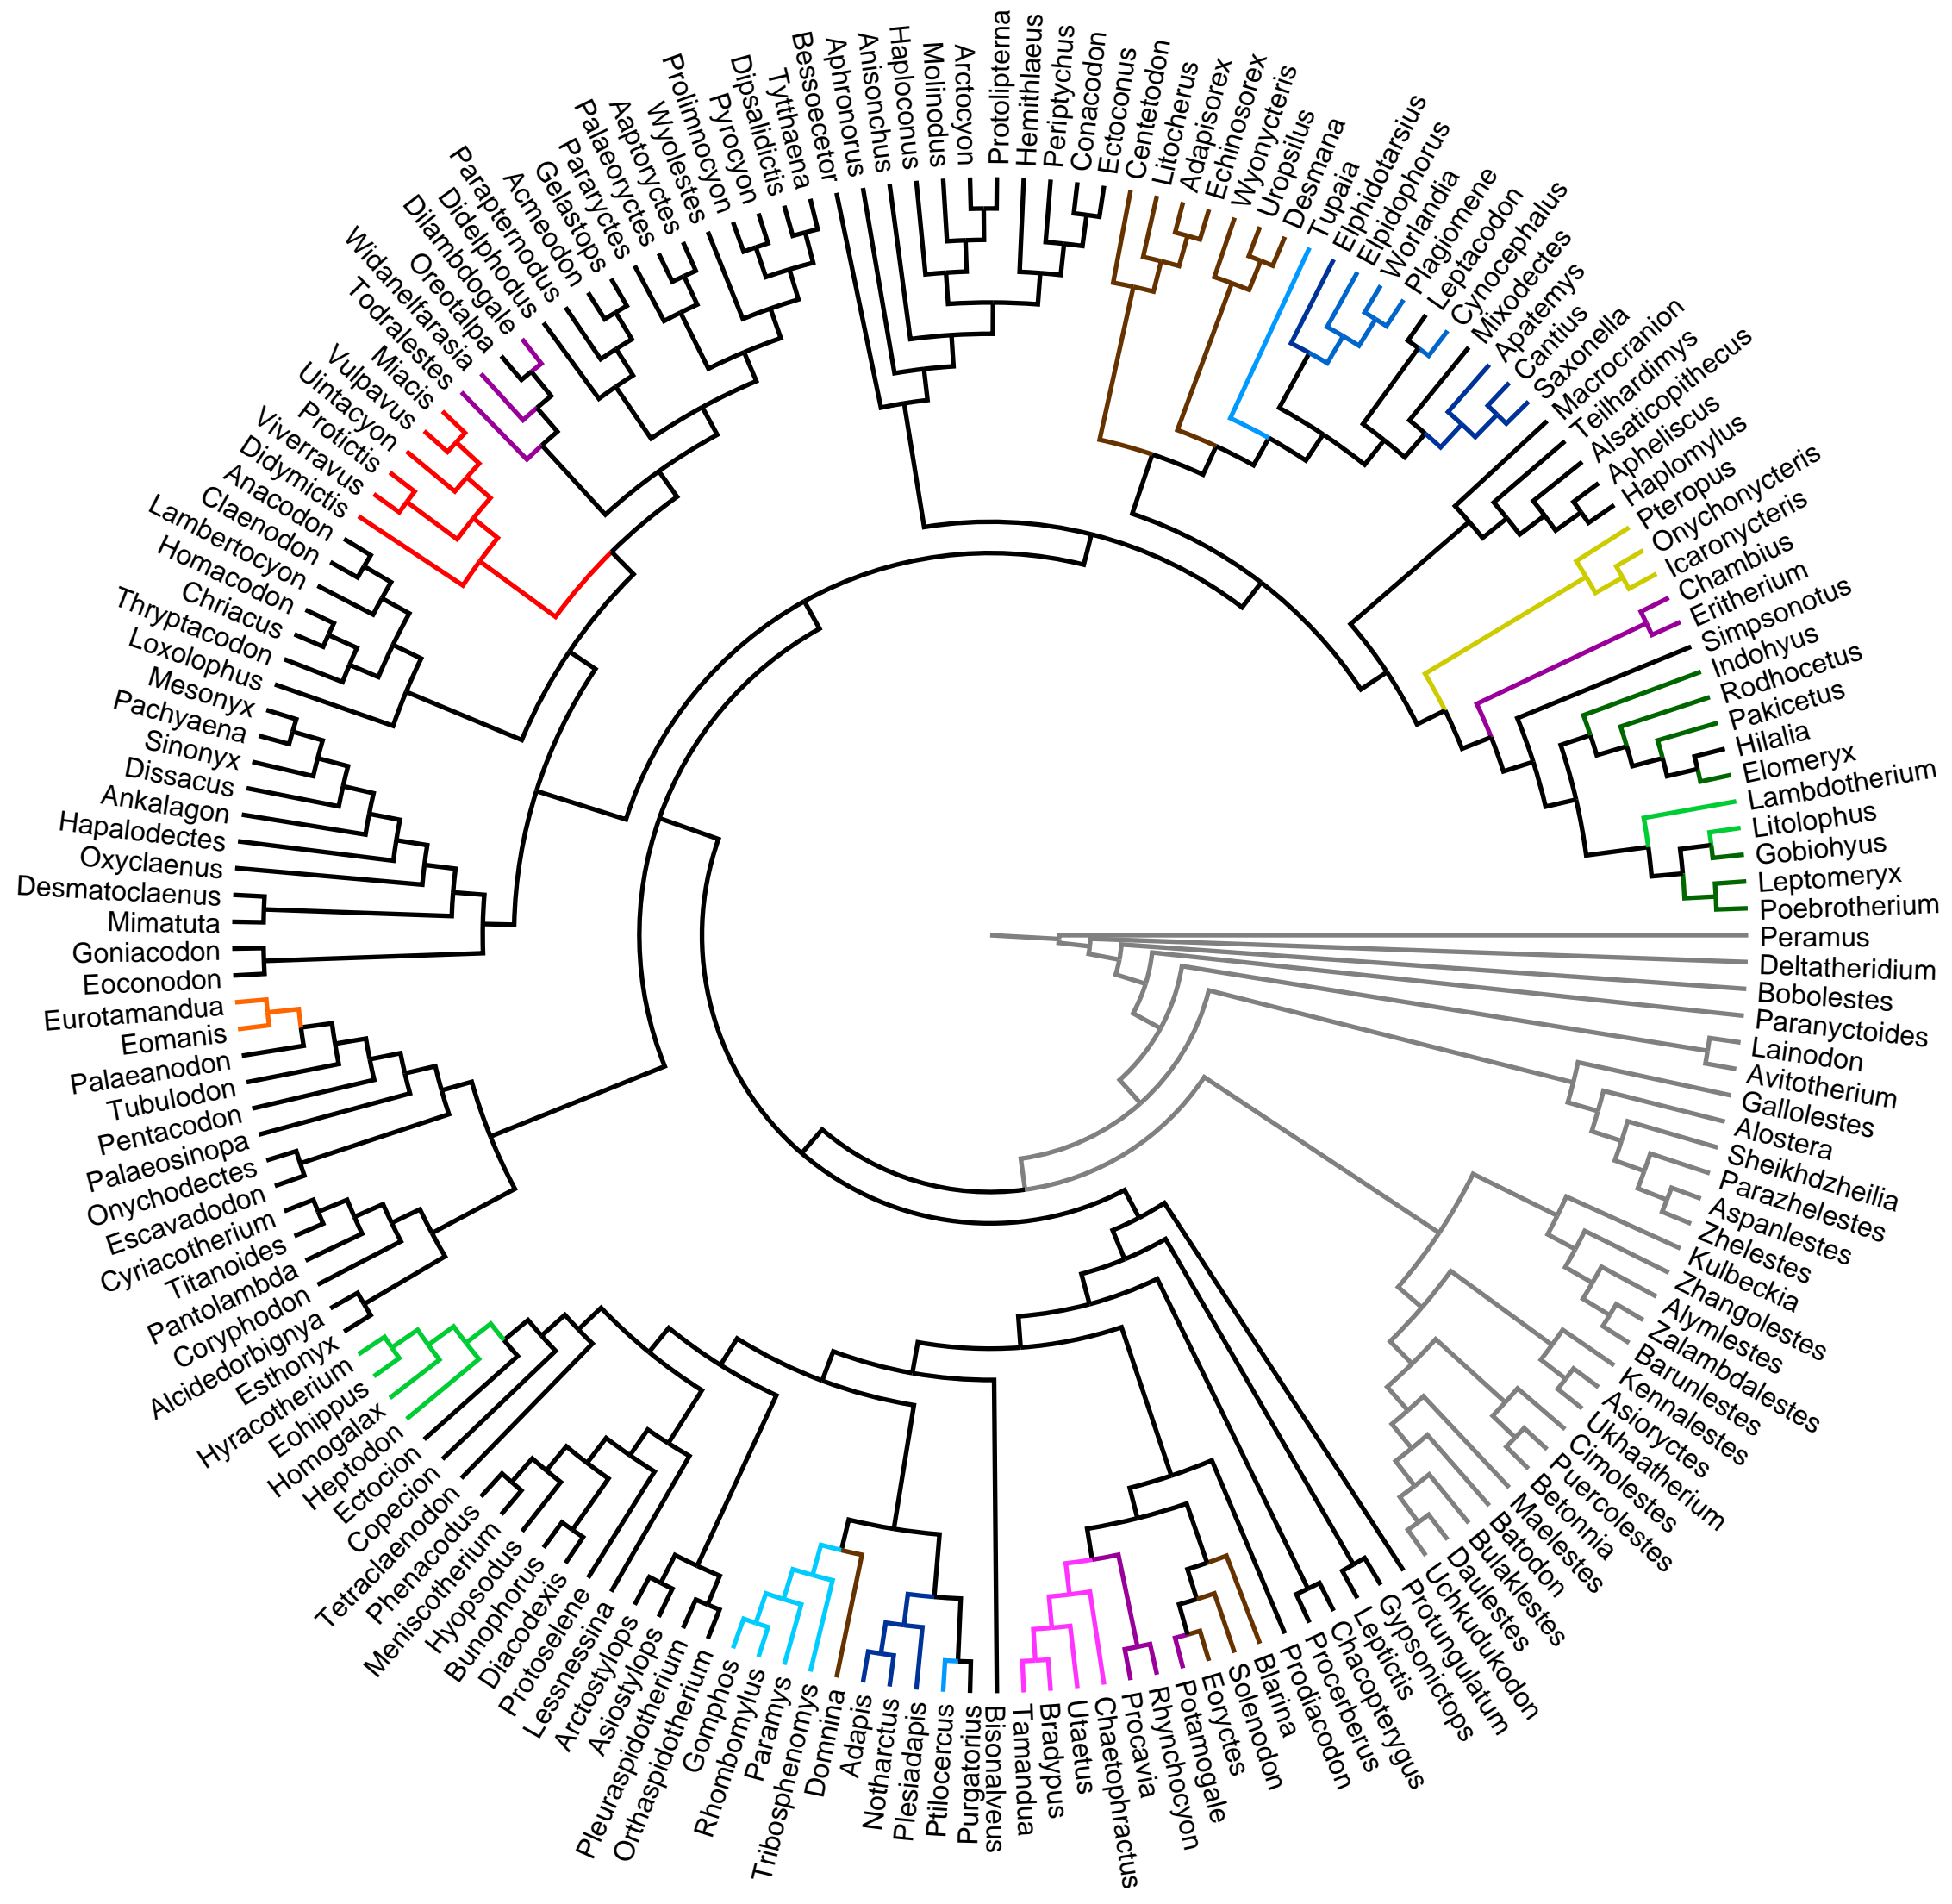

Supplement: BRV-92-521-s005.pdf [file BRV-92-521-s005.pdf]
