# Supplementary material for: Resolving the relationships of Paleocene placental mammals
Source: PubMed Central journal article supplement (PMC6849585; doi:10.1111/brv.12242), 2015-12-21
Supplement: BRV-92-521-s015.pdf [file BRV-92-521-s015.pdf]

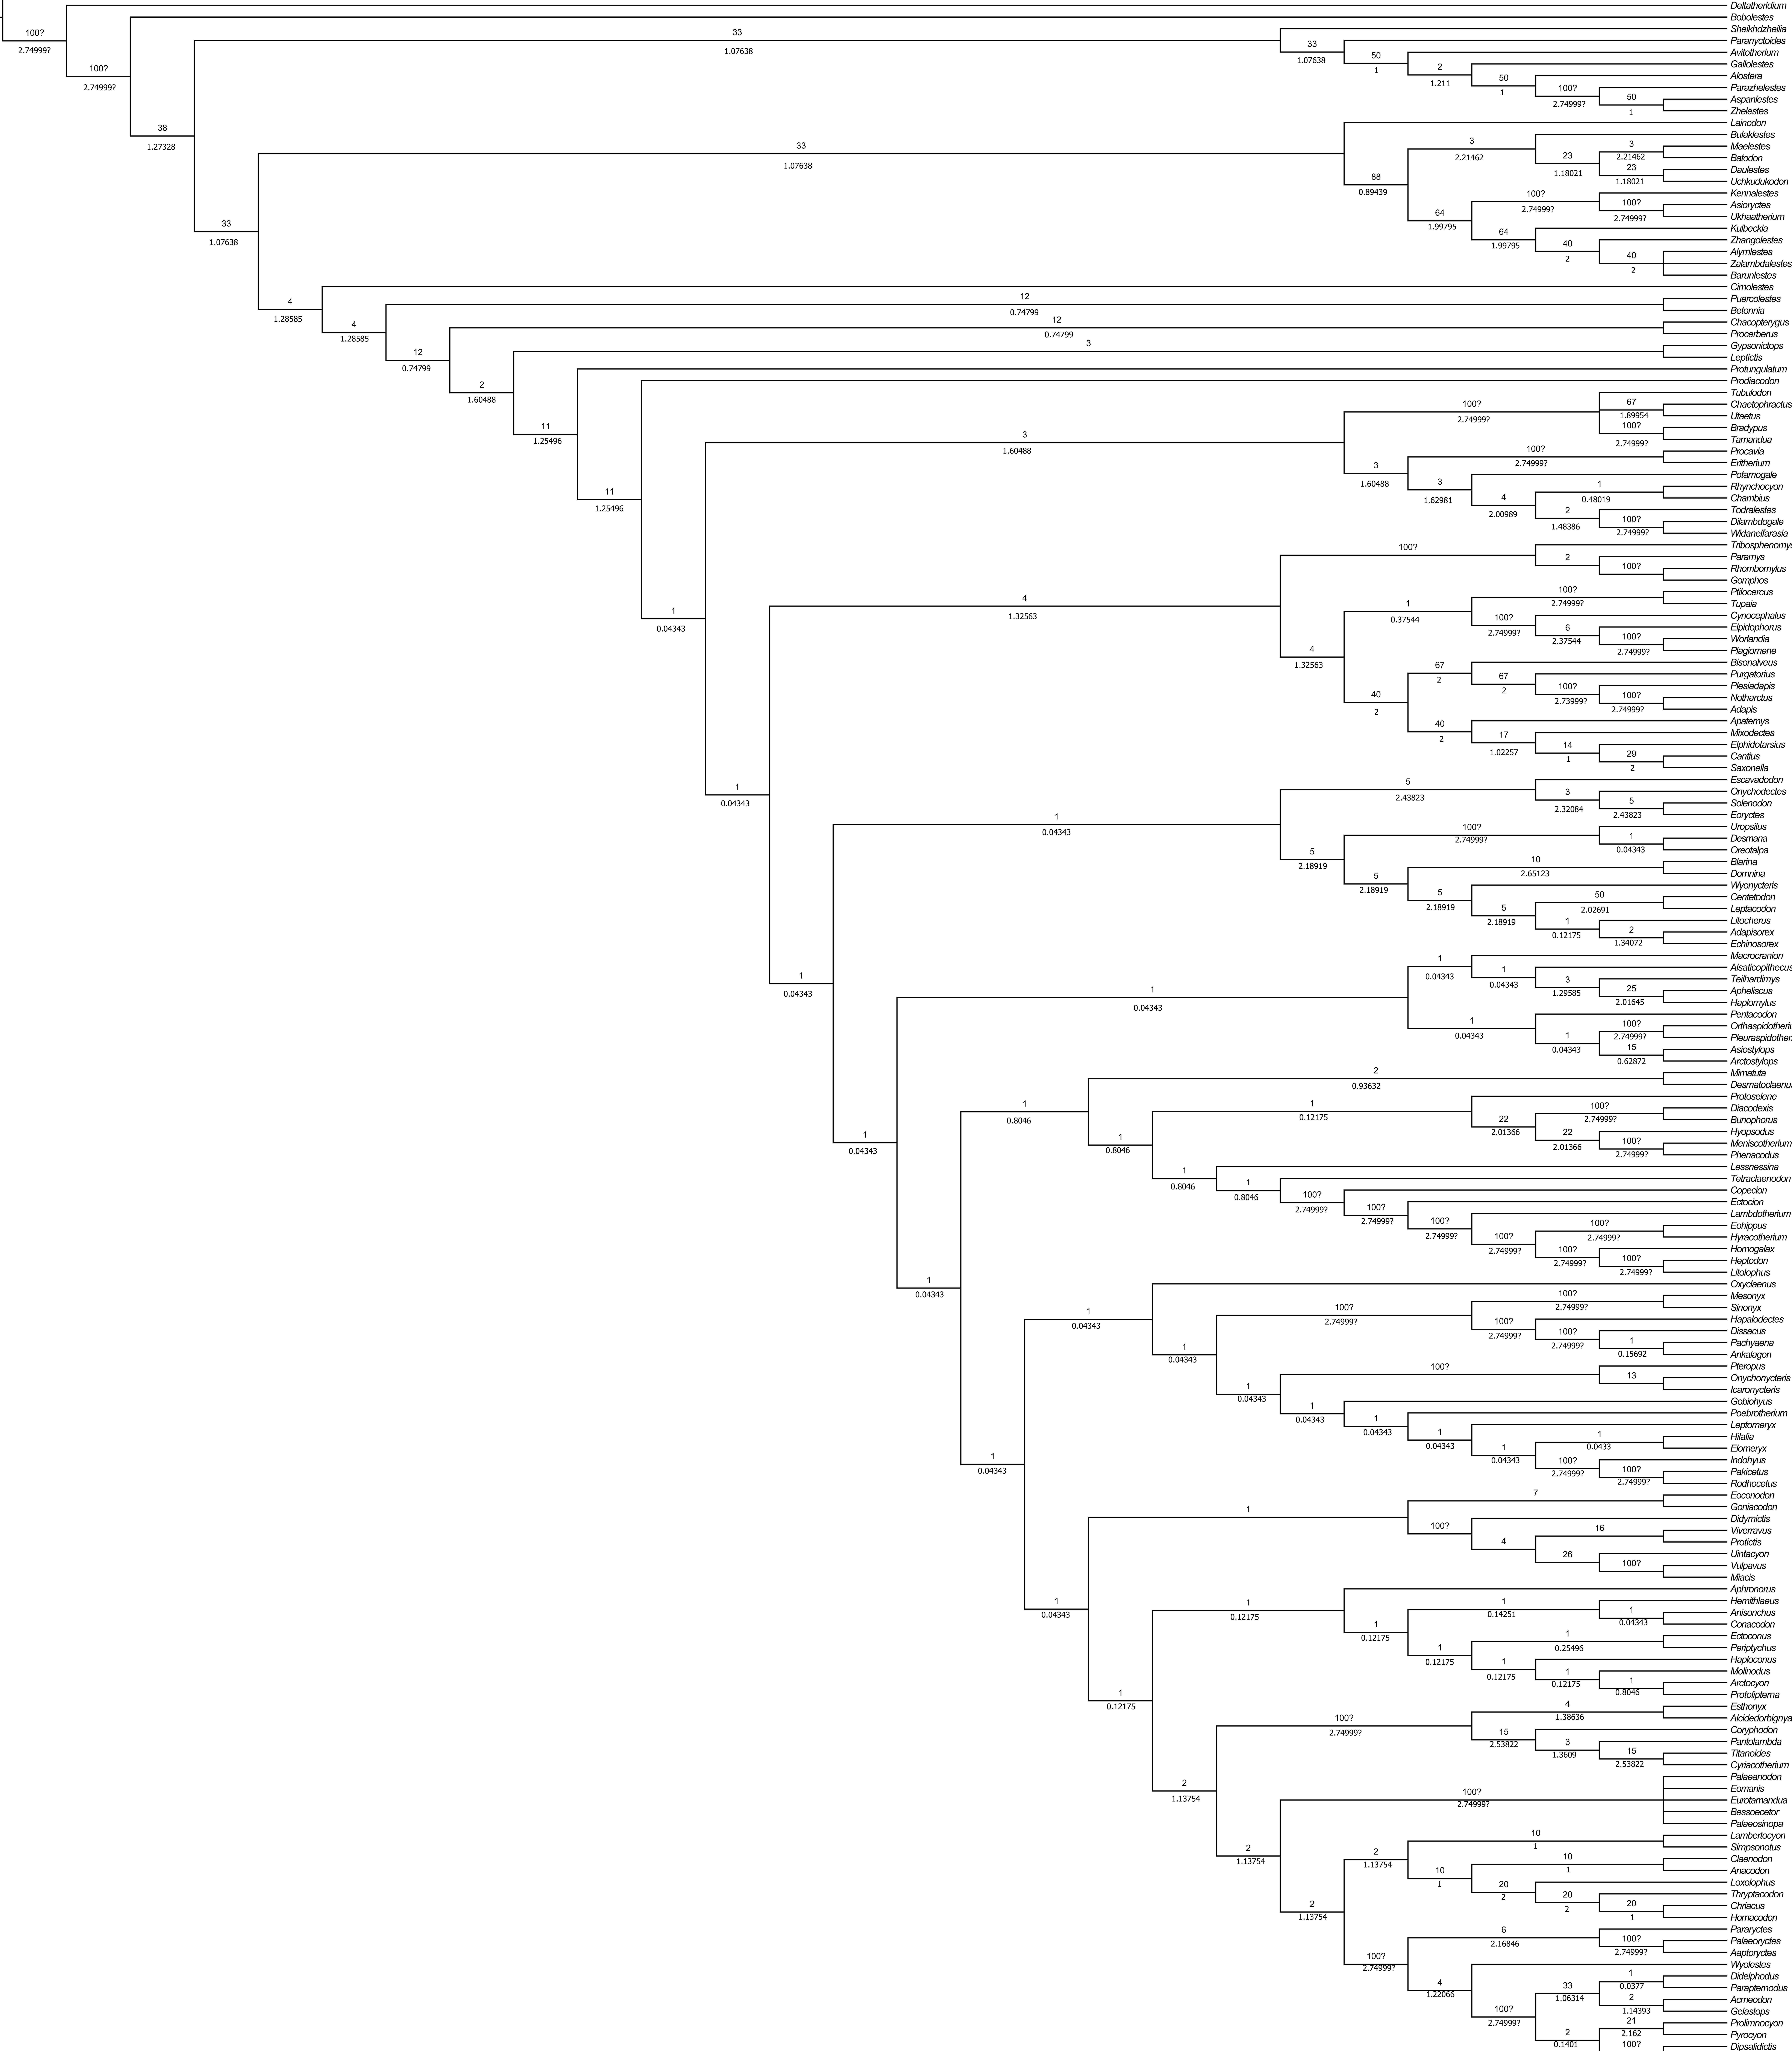

- Paranus
- Belaltheidulum
- Bobolestes
- Sheikhidzhellia
- Paranyctoides
- Avitotherium
- Gallolestes
- Alostera
- Parazhelestes
- Aspanlestes
- Zhelestes
- Lainodon
- Bulaklestes
- Maelestes
- Balodon
- Daulestes
- Uchikudukodon
- Kernalestes
- Asiocyrtus
- Ukrinaetherium
- Kulbeskia
- Zhangolestes
- Aymlestes
- Zalambdalestes
- Barunlestes
- Cimolestes
- Puerolestes
- Beltonia
- Chaocopterygius
- Procerberus
- Gypsonictops
- Leptictis
- Protungulatum
- Prodiacodon
- Tubulodon
- Chaetoptiracrus
- Uliastus
- Bradypus
- Tamandua
- Proavia
- Enitherium
- Potamogale
- Rhynchocyon
- Chambius
- Todralestes
- Dilambogale
- Widanelfarasia
- Tribosphenomys
- Paramys
- Rhombomykus
- Gomphos
- Ptilocercus
- Tupia
- Cynoccephalus
- Elphidotarion
- Worlandia
- Pagiomene
- Bisonalveus
- Purgatorius
- Plesiadapis
- Notharctus
- Adapis
- Apatemys
- Mixodectes
- Elphidotarsius
- Cantius
- Saxonella
- Escavadodon
- Onychodectes
- Stelenodon
- Eryctes
- Urospilus
- Desmana
- Orcotalpa
- Blarina
- Dominina
- Wyonycteris
- Centetodon
- Leptacodon
- Litocherus
- Adapisorex
- Echinosorex
- Macrocranion
- Alsaticopthecus
- Tailhardimys
- Aphelscus
- Haplomys
- Haplacodon
- Orthospicidotherium
- Pleuraspicidotherium
- Asiostylops
- Arctostylops
- Mimatula
- Desmatoclaenus
- Protoselene
- Diacodexis
- Bunophorus
- Hyopsodus
- Meniscotherium
- Phenacodus
- Lessnessina
- Tetracaelaenodon
- Copecion
- Ectacion
- Lambdotherium
- Echippus
- Hyracotherium
- Homogalax
- Haplodon
- Litolophus
- Oxyclaenus
- Mesonyx
- Sinonyx
- Haplodectes
- Dissacus
- Pachyaena
- Ankalagon
- Pteropus
- Onychonycteris
- Icaronycteris
- Gobiohyus
- Poebrotherium
- Hillia
- Elomeryx
- Indohyus
- Pakicetus
- Rodhocetus
- Eoconodon
- Goniaconodon
- Didymictis
- Viverravus
- Protictis
- Uintacyon
- Vulpavus
- Miacis
- Aphronorus
- Hemithlaeus
- Anisodon
- Eotacurus
- Periplyctus
- Haplacodus
- Molihodus
- Arctacyon
- Protoliptema
- Esthonyx
- Alcidobribignya
- Coryphodon
- Pantolambda
- Titanoides
- Cynacotherium
- Palaeonodon
- Eomanis
- Eurotamandua
- Bessoeoctor
- Lambericoyon
- Simpsonocyon
- Claconodon
- Anacodon
- Loxolophus
- Thryplacodon
- Chriacus
- Homacodon
- Pararyctes
- Palaeoryctes
- Aptoryctes
- Wyolestes
- Didelphodus
- Paraptomodus
- Acmeodon
- Gelastops
- Prolimnocyon
- Pyrocyon
- Dipsosictis
- Tythraena
